# Supplementary material for: Co-Co9S8-NC particles anchored on 3D hyperfine carbon nanofiber networks with a hierarchical structure as a catalyst promoting polysulfide conversion for lithium–sulfur batteries
Source: Royal Society of Chemistry journal article supplement (doi:10.1039/d2ta09323e), 2023-01-01
Supplement: d2ta09323e1.pdf [file d2ta09323e1.pdf]

## Supporting Information

### Co-Co<sub>9</sub>S<sub>8</sub>-NC particles anchored on 3D hyperfine carbon nanofiber networks with a hierarchical structure as a catalyst promoting polysulfide conversion for lithium-sulfur batteries

Ning Gao <sup>a</sup>, Xuetao Shen <sup>a\*</sup>, Yifan Liu <sup>a</sup>, Zhanwei Xu <sup>a</sup>, Xi Wang <sup>a</sup>, Hangyu Liu <sup>a</sup>, Yuchuan Ren <sup>a</sup>, Siyu Chen <sup>a</sup>, Zhi Li <sup>b\*</sup>

<sup>a</sup> School of Materials Science and Engineering, Shaanxi Key Laboratory of Green Preparation and Functionalization for Inorganic Materials, Shaanxi University of Science and Technology, Xi'an 710021, Shaanxi, PR China

<sup>b</sup> Department of Chemical and Materials Engineering, University of Alberta, Edmonton, Alberta T6G 1H9, Canada

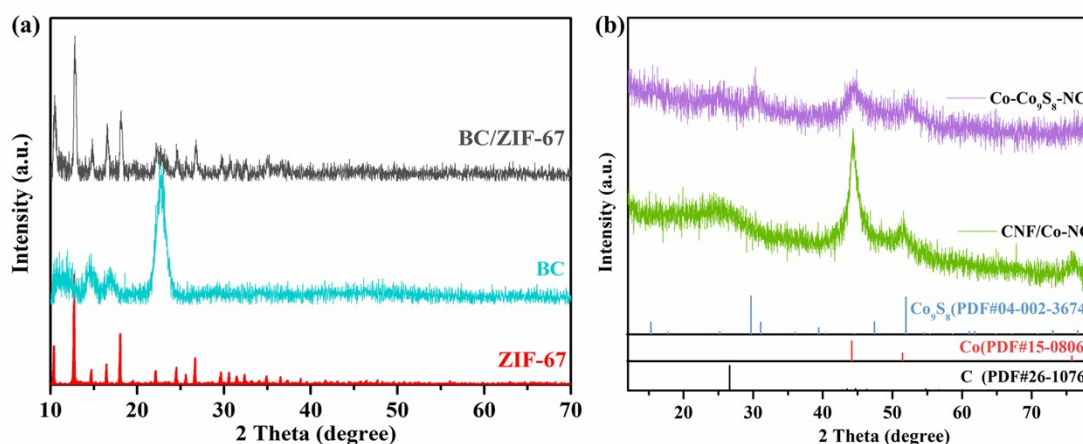

Fig. S1 XRD pattern of (a) BC/ZIF-67, BC and ZIF 67; (b) Co-Co<sub>9</sub>S<sub>8</sub>-NC and CNF/Co-NC.

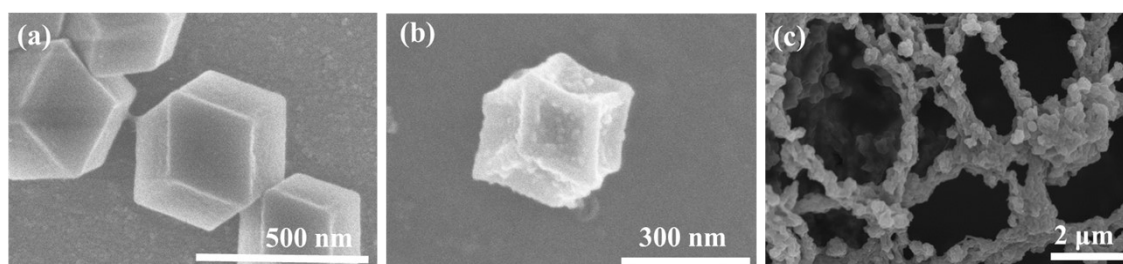

Fig. S2 SEM images: (a) ZIF-67; (b) Co-Co<sub>9</sub>S<sub>8</sub>-NC; (c) CNF/Co-NC.

\* Corresponding author.

E-mail address: shenxuetao@sust.edu.cn (X. T. Shen); zhi.li@ualberta.ca (Z. Li)

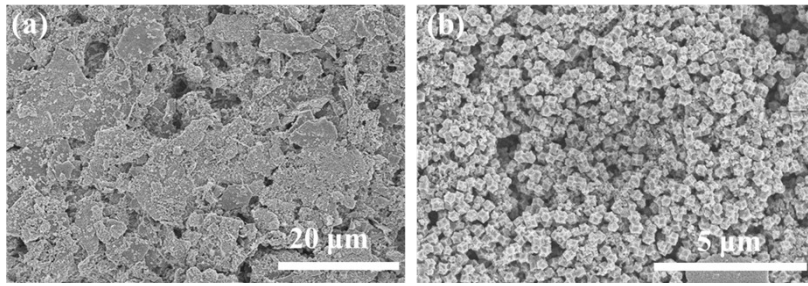

Fig. S3 SEM images of surface morphology: (a) CNF/Co-NC separator; (b) Co-Co<sub>9</sub>S<sub>8</sub>-NC separator.

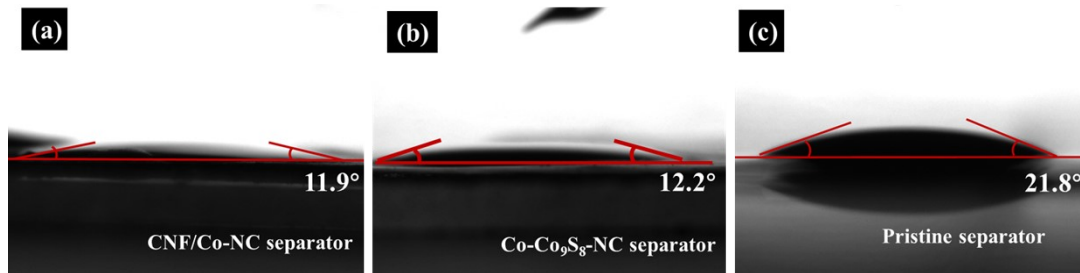

Fig. S4 Contact angles between the electrolyte and separators: (a) the CNF/Co-NC separator; (b) Co- Co<sub>9</sub>S<sub>8</sub>-NC separator; (c) pristine separator.

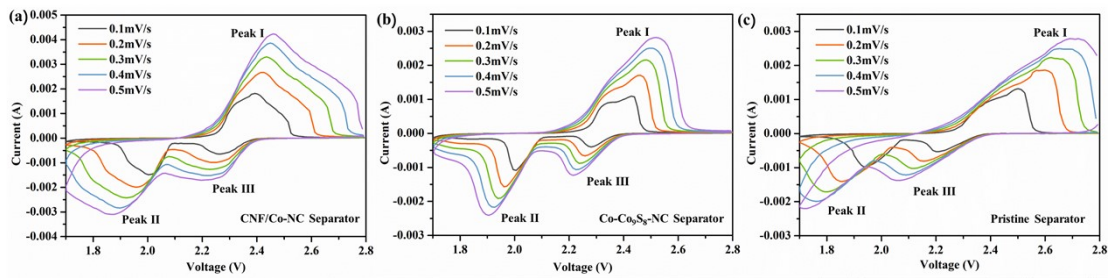

Fig. S5 CV curves of Li-S batteries with (a) CNF/Co-NC, (b) Co- Co<sub>9</sub>S<sub>8</sub>-NC, and (c) pristine separators at different sweep speeds.

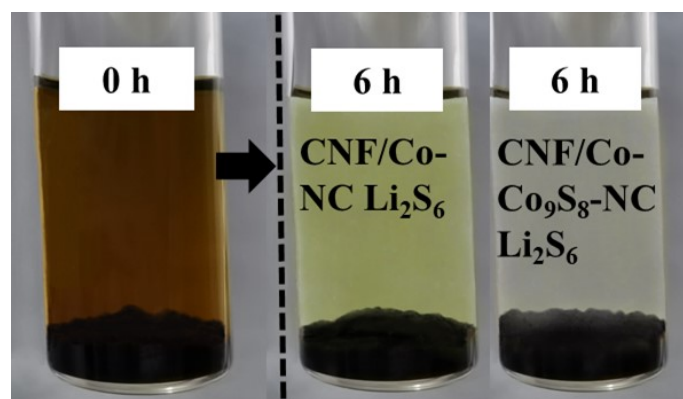

Fig. S6 LiPSs adsorption ability of CNF/Co-NC and CNF/Co-Co<sub>9</sub>S<sub>8</sub>-NC composites in the Li<sub>2</sub>S<sub>6</sub> solution.
